# Supplementary material
Source: publisher figshare collection journal article supplement (https://frontiersin.figshare.com/ndownloader/files/22043433)

Module90

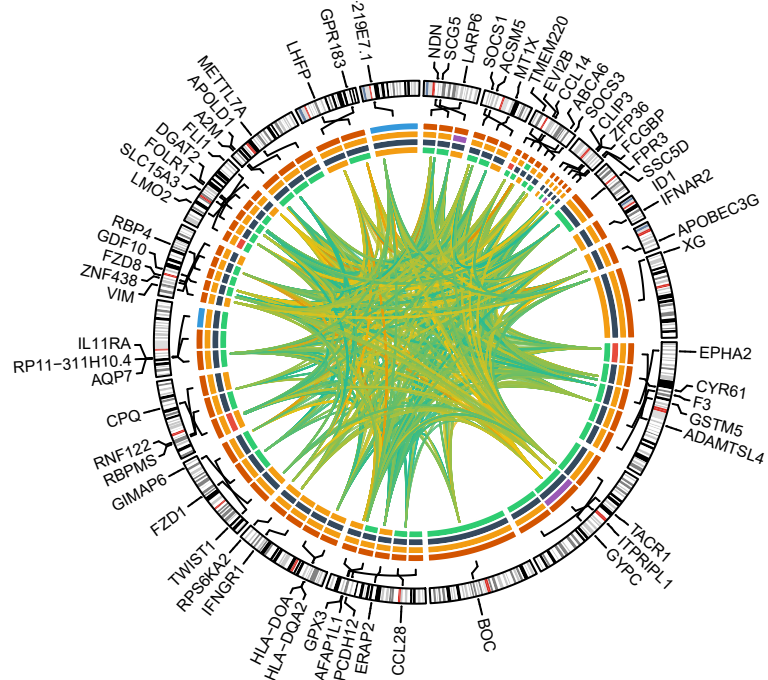

Module110

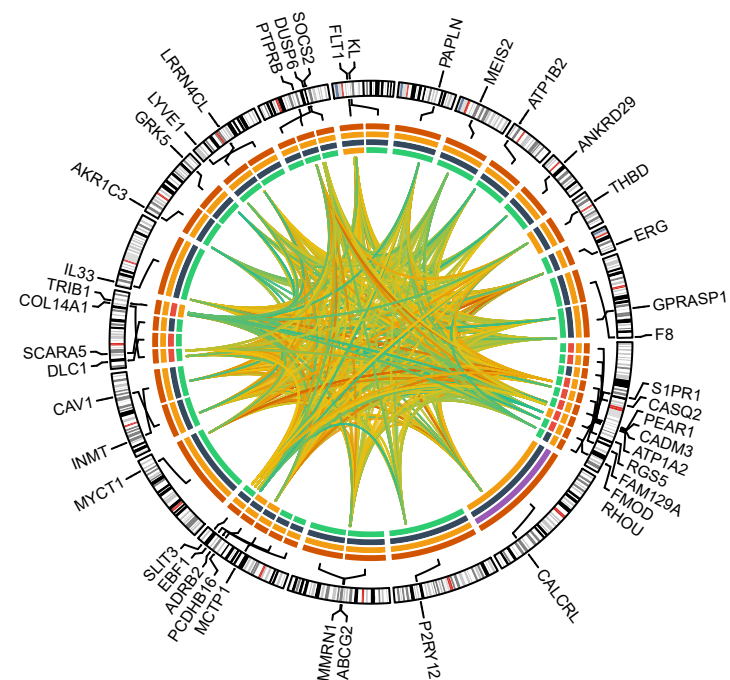

**1st circle (out)**

- IncRNA
- PCG

**2nd circle**

- Non Dys-Methylation Gene
- Hypor Methylation Gene
- Hyper Methylation Gene

**3rd circle**

- CNV Gene
- Non CNV Gene

Module128

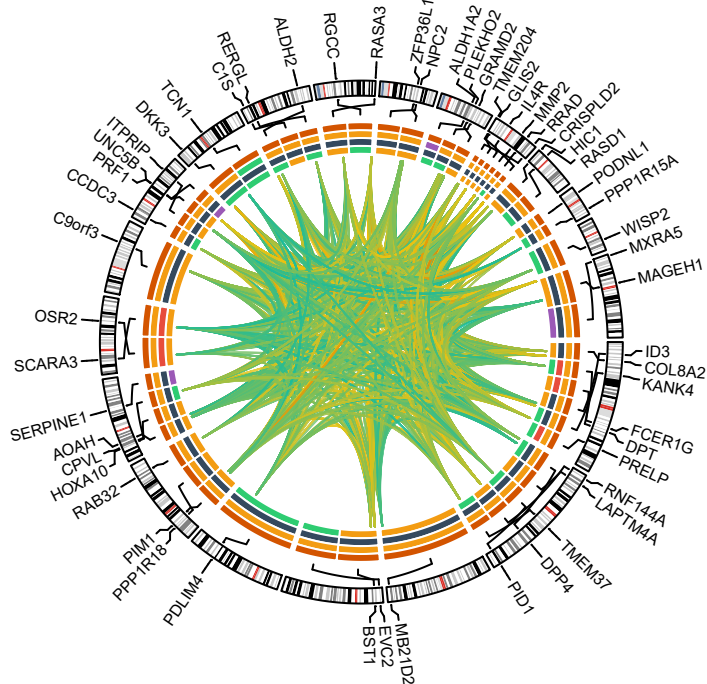

**4th circle (in)**

- Non Dys-Expressed Gene
- Lowly Expressed Gene
- Highly Expressed Gene

Module309

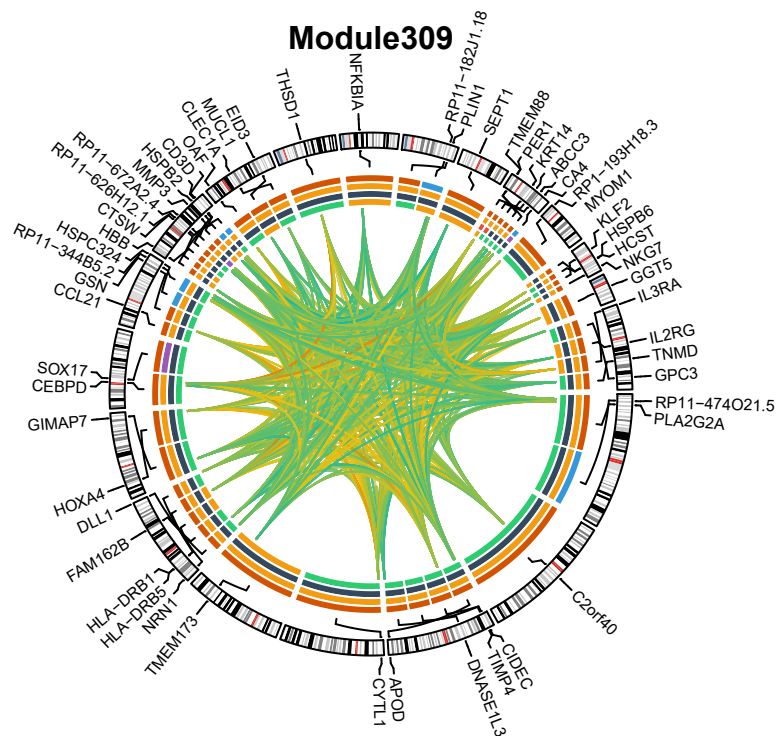

Supplement: Supplementary file [file 22043433]
